# Supplementary material for: Gene Flow between the Korean Peninsula and Its Neighboring Countries
Source: PLoS One. 2010 Jul 29;5(7):e11855. doi: 10.1371/journal.pone.0011855 (PMC2912326; doi:10.1371/journal.pone.0011855)
Supplement: Table S1 — Fst, IBS, and Monomorphic marker. (0.07 MB XLS) [file pone.0011855.s002.xls]

## Sheet: fst.ibs.mono
			Suppl. Table 1. Fst, IBS and Monomorphic markers
	Region1	Region2		FST		meanIBS	Mono[i,j]
			Fst	Fis	Fit
	GU	GU	NA	NA	NA	0.75579	6620
	GU	GJ	0.016687	-0.018287	-0.035568	0.763276	5361
	GU	JC	0.016347	-0.017857	-0.034772	0.762158	5239
	GU	YC	0.016293	-0.018798	-0.035672	0.761854	5193
	GU	PC	0.016353	-0.01798	-0.034904	0.763504	5324
	GU	GR	0.016945	-0.017024	-0.034554	0.759455	5089
	GU	JJ	0.018311	-0.016142	-0.035096	0.761801	5143
	GU	NJ	0.016395	-0.016006	-0.032941	0.763335	5270
	GU	US	0.016559	-0.017178	-0.034305	0.763498	5245
	GU	CA	0.016175	-0.017765	-0.034499	0.763534	5277
	GU	VN	0.021536	-0.009683	-0.031906	0.759105	4891
	GU	CB	0.025845	-0.008676	-0.035436	0.750525	3966
	GU	JL	0.017343	-0.016903	-0.03485	0.761353	4955
	GU	MH	0.021705	-0.01187	-0.03432	0.751528	3584
	GU	CHB	0.017527	-0.015916	-0.03404	0.762157	5060
	GU	JPT	0.017797	-0.013859	-0.03223	0.762117	5193
	GU	AI	0.073561	0.06201	-0.012468	0.731008	4018
	GU	CEU	0.077029	0.043449	-0.036382	0.710183	1913
	GU	YRI	0.118332	0.087547	-0.034917	0.680224	1081
	GJ	GU	0.016687	-0.018287	-0.035568	0.763276	5361
	GJ	GJ	NA	NA	NA	0.771663	7925
	GJ	JC	0.016654	-0.01581	-0.033014	0.770522	6044
	GJ	YC	0.016502	-0.016857	-0.03392	0.770123	5957
	GJ	PC	0.01687	-0.015718	-0.033146	0.771801	6148
	GJ	GR	0.017088	-0.015148	-0.032796	0.767695	5847
	GJ	JJ	0.018	-0.01474	-0.03334	0.770527	5926
	GJ	NJ	0.016716	-0.013935	-0.031173	0.771785	6144
	GJ	US	0.016731	-0.015268	-0.032543	0.771986	6138
	GJ	CA	0.016765	-0.015424	-0.032738	0.771673	6094
	GJ	VN	0.022338	-0.007127	-0.030138	0.767105	5632
	GJ	CB	0.026923	-0.005881	-0.033712	0.75817	4599
	GJ	JL	0.017698	-0.014811	-0.033095	0.769575	5735
	GJ	MH	0.021924	-0.00996	-0.032599	0.759872	4114
	GJ	CHB	0.017848	-0.013859	-0.032284	0.770492	5847
	GJ	JPT	0.018237	-0.011669	-0.030462	0.770407	6058
	GJ	AI	0.074145	0.064401	-0.010525	0.739056	4773
	GJ	CEU	0.077886	0.04587	-0.03472	0.717874	2252
	GJ	YRI	0.119501	0.090258	-0.033212	0.687335	1288
	JC	GU	0.016347	-0.017857	-0.034772	0.762158	5239
	JC	GJ	0.016654	-0.01581	-0.033014	0.770522	6044
	JC	JC	NA	NA	NA	0.769666	7562
	JC	YC	0.016064	-0.016528	-0.033124	0.769177	5889
	JC	PC	0.015786	-0.016055	-0.032351	0.771034	6028
	JC	GR	0.016592	-0.01488	-0.032003	0.766689	5739
	JC	JJ	0.01766	-0.01431	-0.032545	0.769426	5807
	JC	NJ	0.016688	-0.013186	-0.030381	0.770338	6028
	JC	US	0.016362	-0.014867	-0.031748	0.770823	6035
	JC	CA	0.015751	-0.015689	-0.031943	0.771024	6033
	JC	VN	0.021779	-0.006932	-0.029351	0.766057	5579
	JC	CB	0.026217	-0.005849	-0.03293	0.757296	4481
	JC	JL	0.016968	-0.014786	-0.032302	0.768603	5611
	JC	MH	0.021452	-0.009688	-0.031822	0.758798	4006
	JC	CHB	0.0178	-0.013133	-0.031493	0.769115	5769
	JC	JPT	0.017874	-0.011269	-0.029673	0.769218	5941
	JC	AI	0.073446	0.064418	-0.009744	0.738152	4604
	JC	CEU	0.077177	0.045846	-0.033951	0.716955	2165
	JC	YRI	0.1192	0.090627	-0.03244	0.68629	1250
	YC	GU	0.016293	-0.018798	-0.035672	0.761854	5193
	YC	GJ	0.016502	-0.016857	-0.03392	0.770123	5957
	YC	JC	0.016064	-0.016528	-0.033124	0.769177	5889
	YC	YC	NA	NA	NA	0.768668	7431
	YC	PC	0.016236	-0.01648	-0.033256	0.770233	5940
	YC	GR	0.016509	-0.015854	-0.032906	0.766313	5665
	YC	JJ	0.017599	-0.015262	-0.033449	0.768901	5699
	YC	NJ	0.016121	-0.01466	-0.031286	0.770283	5940
	YC	US	0.0161	-0.016028	-0.032654	0.770442	5895
	YC	CA	0.01614	-0.016178	-0.032848	0.770279	5924
	YC	VN	0.021762	-0.007833	-0.030253	0.765561	5509
	YC	CB	0.026026	-0.006912	-0.033818	0.75692	4426
	YC	JL	0.017022	-0.015617	-0.033204	0.768116	5536
	YC	MH	0.021437	-0.010569	-0.032707	0.758242	3994
	YC	CHB	0.017203	-0.014634	-0.032394	0.768902	5626
	YC	JPT	0.017725	-0.012309	-0.030576	0.768847	5802
	YC	AI	0.073933	0.064039	-0.010683	0.737295	4474
	YC	CEU	0.077006	0.044868	-0.034819	0.716479	2125
	YC	YRI	0.118593	0.089227	-0.033318	0.686055	1216
	PC	GU	0.016353	-0.01798	-0.034904	0.763504	5324
	PC	GJ	0.01687	-0.015718	-0.033146	0.771801	6148
	PC	JC	0.015786	-0.016055	-0.032351	0.771034	6028
	PC	YC	0.016236	-0.01648	-0.033256	0.770233	5940
	PC	PC	NA	NA	NA	0.7724	7758
	PC	GR	0.016654	-0.014945	-0.032134	0.767945	5843
	PC	JJ	0.017603	-0.014499	-0.032677	0.770798	5882
	PC	NJ	0.016286	-0.013729	-0.030512	0.772046	6131
	PC	US	0.016279	-0.015082	-0.03188	0.77228	6114
	PC	CA	0.015953	-0.01561	-0.032075	0.772284	6119
	PC	VN	0.021571	-0.007273	-0.029481	0.767646	5630
	PC	CB	0.025962	-0.006239	-0.033059	0.758905	4536
	PC	JL	0.017159	-0.014718	-0.032433	0.769957	5724
	PC	MH	0.021508	-0.009755	-0.031951	0.760084	4113
	PC	CHB	0.017432	-0.01364	-0.031624	0.770836	5847
	PC	JPT	0.017691	-0.011585	-0.029803	0.770842	6049
	PC	AI	0.073637	0.064495	-0.009868	0.739557	4673
	PC	CEU	0.076788	0.04532	-0.034085	0.718478	2214
	PC	YRI	0.118986	0.090293	-0.032568	0.687613	1283
	GR	GU	0.016945	-0.017024	-0.034554	0.759455	5089
	GR	GJ	0.017088	-0.015148	-0.032796	0.767695	5847
	GR	JC	0.016592	-0.01488	-0.032003	0.766689	5739
	GR	YC	0.016509	-0.015854	-0.032906	0.766313	5665
	GR	PC	0.016654	-0.014945	-0.032134	0.767945	5843
	GR	GR	NA	NA	NA	0.763934	7404
	GR	JJ	0.018259	-0.01348	-0.032328	0.766553	5652
	GR	NJ	0.016674	-0.012988	-0.030165	0.767826	5830
	GR	US	0.016695	-0.01431	-0.031531	0.768092	5817
	GR	CA	0.016317	-0.014892	-0.031726	0.768034	5791
	GR	VN	0.0223	-0.006186	-0.029136	0.763252	5411
	GR	CB	0.026369	-0.005485	-0.032716	0.754768	4300
	GR	JL	0.017638	-0.013881	-0.032085	0.765735	5443
	GR	MH	0.021752	-0.009171	-0.031611	0.756096	3872
	GR	CHB	0.018009	-0.012705	-0.031277	0.766435	5559
	GR	JPT	0.018168	-0.010755	-0.029458	0.766552	5752
	GR	AI	0.072886	0.064051	-0.009529	0.736086	4475
	GR	CEU	0.077202	0.046075	-0.033732	0.714507	2098
	GR	YRI	0.119158	0.090769	-0.03223	0.68386	1244
	JJ	GU	0.018311	-0.016142	-0.035096	0.761801	5143
	JJ	GJ	0.018	-0.01474	-0.03334	0.770527	5926
	JJ	JC	0.01766	-0.01431	-0.032545	0.769426	5807
	JJ	YC	0.017599	-0.015262	-0.033449	0.768901	5699
	JJ	PC	0.017603	-0.014499	-0.032677	0.770798	5882
	JJ	GR	0.018259	-0.01348	-0.032328	0.766553	5652
	JJ	JJ	NA	NA	NA	0.771639	7552
	JJ	NJ	0.017757	-0.012405	-0.030707	0.77058	5905
	JJ	US	0.018102	-0.013392	-0.032075	0.770533	5856
	JJ	CA	0.017638	-0.014062	-0.032269	0.770666	5871
	JJ	VN	0.023011	-0.005982	-0.029676	0.766231	5468
	JJ	CB	0.027271	-0.005072	-0.03325	0.757577	4422
	JJ	JL	0.019008	-0.012999	-0.032627	0.768272	5479
	JJ	MH	0.022736	-0.008674	-0.032141	0.758831	4012
	JJ	CHB	0.019453	-0.011746	-0.031818	0.769033	5621
	JJ	JPT	0.018562	-0.01088	-0.029999	0.769811	5822
	JJ	AI	0.073757	0.064416	-0.010085	0.738798	4603
	JJ	CEU	0.076496	0.044834	-0.034285	0.718298	2179
	JJ	YRI	0.11892	0.090059	-0.032756	0.687095	1240
	NJ	GU	0.016395	-0.016006	-0.032941	0.763335	5270
	NJ	GJ	0.016716	-0.013935	-0.031173	0.771785	6144
	NJ	JC	0.016688	-0.013186	-0.030381	0.770338	6028
	NJ	YC	0.016121	-0.01466	-0.031286	0.770283	5940
	NJ	PC	0.016286	-0.013729	-0.030512	0.772046	6131
	NJ	GR	0.016674	-0.012988	-0.030165	0.767826	5830
	NJ	JJ	0.017757	-0.012405	-0.030707	0.77058	5905
	NJ	NJ	NA	NA	NA	0.772144	7667
	NJ	US	0.016538	-0.012875	-0.029907	0.772003	6117
	NJ	CA	0.016182	-0.013434	-0.030102	0.771976	6125
	NJ	VN	0.021396	-0.005531	-0.027515	0.767571	5630
	NJ	CB	0.026303	-0.004001	-0.031123	0.758667	4538
	NJ	JL	0.017365	-0.012572	-0.030466	0.769768	5740
	NJ	MH	0.021543	-0.007834	-0.030024	0.76005	4089
	NJ	CHB	0.017547	-0.011592	-0.029659	0.770631	5864
	NJ	JPT	0.017902	-0.009436	-0.027836	0.770547	6022
	NJ	AI	0.072931	0.06568	-0.007822	0.739961	4638
	NJ	CEU	0.077486	0.047783	-0.032198	0.717951	2201
	NJ	YRI	0.118754	0.091739	-0.030656	0.687749	1282
	US	GU	0.016559	-0.017178	-0.034305	0.763498	5245
	US	GJ	0.016731	-0.015268	-0.032543	0.771986	6138
	US	JC	0.016362	-0.014867	-0.031748	0.770823	6035
	US	YC	0.0161	-0.016028	-0.032654	0.770442	5895
	US	PC	0.016279	-0.015082	-0.03188	0.77228	6114
	US	GR	0.016695	-0.01431	-0.031531	0.768092	5817
	US	JJ	0.018102	-0.013392	-0.032075	0.770533	5856
	US	NJ	0.016538	-0.012875	-0.029907	0.772003	6117
	US	US	NA	NA	NA	0.772723	7758
	US	CA	0.015961	-0.015008	-0.031471	0.772399	6080
	US	VN	0.021658	-0.006594	-0.028877	0.767645	5614
	US	CB	0.025739	-0.005893	-0.032467	0.759089	4547
	US	JL	0.017574	-0.013698	-0.031831	0.769772	5715
	US	MH	0.021841	-0.008835	-0.031361	0.760058	4075
	US	CHB	0.01747	-0.01301	-0.031022	0.770885	5834
	US	JPT	0.017916	-0.01076	-0.029199	0.770777	6032
	US	AI	0.073718	0.065176	-0.009222	0.739468	4643
	US	CEU	0.07715	0.046237	-0.033497	0.718384	2206
	US	YRI	0.119086	0.090912	-0.031983	0.687725	1238
	CA	GU	0.016175	-0.017765	-0.034499	0.763534	5277
	CA	GJ	0.016765	-0.015424	-0.032738	0.771673	6094
	CA	JC	0.015751	-0.015689	-0.031943	0.771024	6033
	CA	YC	0.01614	-0.016178	-0.032848	0.770279	5924
	CA	PC	0.015953	-0.01561	-0.032075	0.772284	6119
	CA	GR	0.016317	-0.014892	-0.031726	0.768034	5791
	CA	JJ	0.017638	-0.014062	-0.032269	0.770666	5871
	CA	NJ	0.016182	-0.013434	-0.030102	0.771976	6125
	CA	US	0.015961	-0.015008	-0.031471	0.772399	6080
	CA	CA	NA	NA	NA	0.772177	7712
	CA	VN	0.02137	-0.007081	-0.029072	0.767642	5625
	CA	CB	0.025864	-0.00595	-0.032659	0.75884	4554
	CA	JL	0.01704	-0.01444	-0.032026	0.769917	5673
	CA	MH	0.021349	-0.009529	-0.031552	0.760126	4093
	CA	CHB	0.017337	-0.013338	-0.031216	0.770829	5835
	CA	JPT	0.017795	-0.011076	-0.029394	0.770606	6034
	CA	AI	0.07353	0.064794	-0.009429	0.739441	4670
	CA	CEU	0.07716	0.046084	-0.033674	0.718113	2223
	CA	YRI	0.11903	0.090687	-0.032172	0.687558	1253
	VN	GU	0.021536	-0.009683	-0.031906	0.759105	4891
	VN	GJ	0.022338	-0.007127	-0.030138	0.767105	5632
	VN	JC	0.021779	-0.006932	-0.029351	0.766057	5579
	VN	YC	0.021762	-0.007833	-0.030253	0.765561	5509
	VN	PC	0.021571	-0.007273	-0.029481	0.767646	5630
	VN	GR	0.0223	-0.006186	-0.029136	0.763252	5411
	VN	JJ	0.023011	-0.005982	-0.029676	0.766231	5468
	VN	NJ	0.021396	-0.005531	-0.027515	0.767571	5630
	VN	US	0.021658	-0.006594	-0.028877	0.767645	5614
	VN	CA	0.02137	-0.007081	-0.029072	0.767642	5625
	VN	VN	NA	NA	NA	0.770718	7405
	VN	CB	0.020035	-0.009469	-0.030108	0.761969	4540
	VN	JL	0.020296	-0.008544	-0.029437	0.766975	5386
	VN	MH	0.026131	-0.002128	-0.029017	0.756018	3894
	VN	CHB	0.019402	-0.008677	-0.028635	0.768534	5497
	VN	JPT	0.023262	-0.00293	-0.026816	0.76613	5545
	VN	AI	0.076475	0.070169	-0.006828	0.736502	4434
	VN	CEU	0.074707	0.045829	-0.03121	0.719161	2164
	VN	YRI	0.116789	0.090597	-0.029655	0.688456	1232
	CB	GU	0.025845	-0.008676	-0.035436	0.750525	3966
	CB	GJ	0.026923	-0.005881	-0.033712	0.75817	4599
	CB	JC	0.026217	-0.005849	-0.03293	0.757296	4481
	CB	YC	0.026026	-0.006912	-0.033818	0.75692	4426
	CB	PC	0.025962	-0.006239	-0.033059	0.758905	4536
	CB	GR	0.026369	-0.005485	-0.032716	0.754768	4300
	CB	JJ	0.027271	-0.005072	-0.03325	0.757577	4422
	CB	NJ	0.026303	-0.004001	-0.031123	0.758667	4538
	CB	US	0.025739	-0.005893	-0.032467	0.759089	4547
	CB	CA	0.025864	-0.00595	-0.032659	0.75884	4554
	CB	VN	0.020035	-0.009469	-0.030108	0.761969	4540
	CB	CB	NA	NA	NA	0.759858	5891
	CB	JL	0.024851	-0.007338	-0.033009	0.758032	4342
	CB	MH	0.027679	-0.003944	-0.032524	0.749445	3299
	CB	CHB	0.023996	-0.007445	-0.032213	0.759682	4469
	CB	JPT	0.026979	-0.002626	-0.030425	0.757732	4484
	CB	AI	0.074629	0.064564	-0.010876	0.7314	3678
	CB	CEU	0.066475	0.034145	-0.034633	0.719439	2070
	CB	YRI	0.108875	0.079355	-0.033126	0.688182	999
	JL	GU	0.017343	-0.016903	-0.03485	0.761353	4955
	JL	GJ	0.017698	-0.014811	-0.033095	0.769575	5735
	JL	JC	0.016968	-0.014786	-0.032302	0.768603	5611
	JL	YC	0.017022	-0.015617	-0.033204	0.768116	5536
	JL	PC	0.017159	-0.014718	-0.032433	0.769957	5724
	JL	GR	0.017638	-0.013881	-0.032085	0.765735	5443
	JL	JJ	0.019008	-0.012999	-0.032627	0.768272	5479
	JL	NJ	0.017365	-0.012572	-0.030466	0.769768	5740
	JL	US	0.017574	-0.013698	-0.031831	0.769772	5715
	JL	CA	0.01704	-0.01444	-0.032026	0.769917	5673
	JL	VN	0.020296	-0.008544	-0.029437	0.766975	5386
	JL	CB	0.024851	-0.007338	-0.033009	0.758032	4342
	JL	JL	NA	NA	NA	0.769511	7284
	JL	MH	0.021475	-0.009743	-0.031903	0.758569	3930
	JL	CHB	0.016282	-0.01478	-0.031576	0.769963	5549
	JL	JPT	0.019256	-0.009929	-0.029759	0.768105	5582
	JL	AI	0.073172	0.064033	-0.00986	0.738112	4498
	JL	CEU	0.075131	0.043674	-0.034012	0.718236	2151
	JL	YRI	0.117513	0.088815	-0.03252	0.6873	1141
	MH	GU	0.021705	-0.01187	-0.03432	0.751528	3584
	MH	GJ	0.021924	-0.00996	-0.032599	0.759872	4114
	MH	JC	0.021452	-0.009688	-0.031822	0.758798	4006
	MH	YC	0.021437	-0.010569	-0.032707	0.758242	3994
	MH	PC	0.021508	-0.009755	-0.031951	0.760084	4113
	MH	GR	0.021752	-0.009171	-0.031611	0.756096	3872
	MH	JJ	0.022736	-0.008674	-0.032141	0.758831	4012
	MH	NJ	0.021543	-0.007834	-0.030024	0.76005	4089
	MH	US	0.021841	-0.008835	-0.031361	0.760058	4075
	MH	CA	0.021349	-0.009529	-0.031552	0.760126	4093
	MH	VN	0.026131	-0.002128	-0.029017	0.756018	3894
	MH	CB	0.027679	-0.003944	-0.032524	0.749445	3299
	MH	JL	0.021475	-0.009743	-0.031903	0.758569	3930
	MH	MH	NA	NA	NA	0.755824	5245
	MH	CHB	0.022259	-0.008161	-0.031113	0.759079	3998
	MH	JPT	0.022806	-0.005857	-0.029332	0.758838	4002
	MH	AI	0.065233	0.056034	-0.00984	0.736283	3676
	MH	CEU	0.060749	0.029258	-0.033528	0.722065	2115
	MH	YRI	0.109053	0.080498	-0.03205	0.686124	728
	CHB	GU	0.017527	-0.015916	-0.03404	0.762157	5060
	CHB	GJ	0.017848	-0.013859	-0.032284	0.770492	5847
	CHB	JC	0.0178	-0.013133	-0.031493	0.769115	5769
	CHB	YC	0.017203	-0.014634	-0.032394	0.768902	5626
	CHB	PC	0.017432	-0.01364	-0.031624	0.770836	5847
	CHB	GR	0.018009	-0.012705	-0.031277	0.766435	5559
	CHB	JJ	0.019453	-0.011746	-0.031818	0.769033	5621
	CHB	NJ	0.017547	-0.011592	-0.029659	0.770631	5864
	CHB	US	0.01747	-0.01301	-0.031022	0.770885	5834
	CHB	CA	0.017337	-0.013338	-0.031216	0.770829	5835
	CHB	VN	0.019402	-0.008677	-0.028635	0.768534	5497
	CHB	CB	0.023996	-0.007445	-0.032213	0.759682	4469
	CHB	JL	0.016282	-0.01478	-0.031576	0.769963	5549
	CHB	MH	0.022259	-0.008161	-0.031113	0.759079	3998
	CHB	CHB	NA	NA	NA	0.771317	7366
	CHB	JPT	0.019015	-0.00939	-0.028955	0.769359	5736
	CHB	AI	0.074247	0.065862	-0.009058	0.738386	4481
	CHB	CEU	0.075377	0.04466	-0.033222	0.718904	2184
	CHB	YRI	0.117318	0.089307	-0.031734	0.688179	1194
	JPT	GU	0.017797	-0.013859	-0.03223	0.762117	5193
	JPT	GJ	0.018237	-0.011669	-0.030462	0.770407	6058
	JPT	JC	0.017874	-0.011269	-0.029673	0.769218	5941
	JPT	YC	0.017725	-0.012309	-0.030576	0.768847	5802
	JPT	PC	0.017691	-0.011585	-0.029803	0.770842	6049
	JPT	GR	0.018168	-0.010755	-0.029458	0.766552	5752
	JPT	JJ	0.018562	-0.01088	-0.029999	0.769811	5822
	JPT	NJ	0.017902	-0.009436	-0.027836	0.770547	6022
	JPT	US	0.017916	-0.01076	-0.029199	0.770777	6032
	JPT	CA	0.017795	-0.011076	-0.029394	0.770606	6034
	JPT	VN	0.023262	-0.00293	-0.026816	0.76613	5545
	JPT	CB	0.026979	-0.002626	-0.030425	0.757732	4484
	JPT	JL	0.019256	-0.009929	-0.029759	0.768105	5582
	JPT	MH	0.022806	-0.005857	-0.029332	0.758838	4002
	JPT	CHB	0.019015	-0.00939	-0.028955	0.769359	5736
	JPT	JPT	NA	NA	NA	0.771547	7656
	JPT	AI	0.073303	0.066685	-0.007142	0.739199	4619
	JPT	CEU	0.075627	0.046493	-0.031518	0.718926	2179
	JPT	YRI	0.118053	0.091622	-0.029968	0.687889	1283
	AI	GU	0.073561	0.06201	-0.012468	0.731008	4018
	AI	GJ	0.074145	0.064401	-0.010525	0.739056	4773
	AI	JC	0.073446	0.064418	-0.009744	0.738152	4604
	AI	YC	0.073933	0.064039	-0.010683	0.737295	4474
	AI	PC	0.073637	0.064495	-0.009868	0.739557	4673
	AI	GR	0.072886	0.064051	-0.009529	0.736086	4475
	AI	JJ	0.073757	0.064416	-0.010085	0.738798	4603
	AI	NJ	0.072931	0.06568	-0.007822	0.739961	4638
	AI	US	0.073718	0.065176	-0.009222	0.739468	4643
	AI	CA	0.07353	0.064794	-0.009429	0.739441	4670
	AI	VN	0.076475	0.070169	-0.006828	0.736502	4434
	AI	CB	0.074629	0.064564	-0.010876	0.7314	3678
	AI	JL	0.073172	0.064033	-0.00986	0.738112	4498
	AI	MH	0.065233	0.056034	-0.00984	0.736283	3676
	AI	CHB	0.074247	0.065862	-0.009058	0.738386	4481
	AI	JPT	0.073303	0.066685	-0.007142	0.739199	4619
	AI	AI	NA	NA	NA	0.784433	9480
	AI	CEU	0.090671	0.079438	-0.012353	0.716321	2691
	AI	YRI	0.142997	0.133866	-0.010654	0.677577	1334
	CEU	GU	0.077029	0.043463	-0.036367	0.710183	1913
	CEU	GJ	0.077881	0.04588	-0.034703	0.717874	2252
	CEU	JC	0.07717	0.045861	-0.033926	0.716955	2165
	CEU	YC	0.076996	0.044863	-0.034813	0.716479	2125
	CEU	PC	0.076787	0.045326	-0.034078	0.718478	2214
	CEU	GR	0.077202	0.046086	-0.03372	0.714507	2098
	CEU	JJ	0.076497	0.044825	-0.034295	0.718298	2179
	CEU	NJ	0.077482	0.047785	-0.03219	0.717951	2201
	CEU	US	0.077145	0.046247	-0.03348	0.718384	2206
	CEU	CA	0.077148	0.046076	-0.03367	0.718113	2223
	CEU	VN	0.074705	0.045829	-0.031207	0.719161	2164
	CEU	CB	0.066475	0.034146	-0.034631	0.719439	2070
	CEU	JL	0.075123	0.043675	-0.034003	0.718236	2151
	CEU	MH	0.060741	0.029246	-0.033532	0.722065	2115
	CEU	CHB	0.07537	0.044675	-0.033196	0.718904	2184
	CEU	JPT	0.075621	0.046493	-0.031511	0.718926	2179
	CEU	AI	0.090663	0.079444	-0.012338	0.716321	2691
	CEU	CEU	NA	NA	NA	0.756395	4833
	CEU	YRI	0.1012	0.070557	-0.034093	0.690743	728
	YRI	GU	0.118332	0.087547	-0.034917	0.680224	1081
	YRI	GJ	0.119501	0.090258	-0.033212	0.687335	1288
	YRI	JC	0.1192	0.090627	-0.03244	0.68629	1250
	YRI	YC	0.118593	0.089227	-0.033318	0.686055	1216
	YRI	PC	0.118986	0.090293	-0.032568	0.687613	1283
	YRI	GR	0.119158	0.090769	-0.03223	0.68386	1244
	YRI	JJ	0.11892	0.090059	-0.032756	0.687095	1240
	YRI	NJ	0.118754	0.091739	-0.030656	0.687749	1282
	YRI	US	0.119086	0.090912	-0.031983	0.687725	1238
	YRI	CA	0.11903	0.090687	-0.032172	0.687558	1253
	YRI	VN	0.116789	0.090597	-0.029655	0.688456	1232
	YRI	CB	0.108875	0.079355	-0.033126	0.688182	999
	YRI	JL	0.117513	0.088815	-0.03252	0.6873	1141
	YRI	MH	0.109053	0.080498	-0.03205	0.686124	728
	YRI	CHB	0.117318	0.089307	-0.031734	0.688179	1194
	YRI	JPT	0.118053	0.091622	-0.029968	0.687889	1283
	YRI	AI	0.142997	0.133866	-0.010654	0.677577	1334
	YRI	CEU	0.101197	0.07054	-0.034108	0.690743	728
	YRI	YRI	NA	NA	NA	0.758884	5600
